# Supplementary material
Source: PubMed Central journal article supplement (PMC5337583)
Supplement: jcsm.13.3.369s1.pdf [file jcsm.13.3.369s1.pdf]

**Table S1**—Nerve conduction studies variables of ulnar and tibial nerves in patients with RLS/WED and control subjects.

| <b>Parameters</b>                     | <b>RLS/WED</b> | <b>Controls</b> | <b>p value</b> |
|---------------------------------------|----------------|-----------------|----------------|
| Ulnar CMAP latency (ms)               | 2.59 ± 0.31    | 2.73 ± 0.32     | 0.163          |
| Ulnar CMAP amplitude (mV)             | 9.24 ± 3.52    | 9.09 ± 2.05     | 0.765          |
| Ulnar CV (m/s)                        | 59.14±2.68     | 60.86 ± 5.45    | 0.746          |
| Ulnar F minimal latency (ms)          | 30.03 ± 20.21  | 25.31 ± 2.21    | 0.776          |
| Ulnar F persistence (%)               | 85.72 ± 21.72  | 80.81 ± 26.63   | 0.837          |
| Tibial CMAP Latency (ms)              | 4.15 ± 0.46    | 4.31 ± 0.58     | 0.393          |
| Tibial CMAP Amplitude (mV)            | 14.31 ± 3.55   | 14.31 ± 6.42    | 0.987          |
| Tibial CV (m/s)                       | 46.53 ± 2.20   | 48.57 ± 3.20    | 0.106          |
| Tibial F minimal latency (ms)         | 44.72 ± 2.91   | 44.73 ± 4.27    | 0.868          |
| Tibial F persistence (%)              | 99.55 ± 1.67   | 95.54 ± 11.61   | 0.521          |
| Median CMAP latency (ms)              | 3.37 ± 0.32    | 3.47 ± 0.38     | 0.579          |
| Median CMAP amplitude (mV)            | 11.77 ± 5.28   | 13.98 ± 3.26    | 0.065          |
| Median CV (m/s)                       | 56.77 ± 3.17   | 57.79 ± 2.19    | 0.182          |
| Median F minimal latency (ms)         | 24.45 ± 2.03   | 24.82 ± 2.08    | 0.705          |
| Median F persistence (%)              | 72.84 ± 14.40  | 81.51 ± 14.69   | 0.218          |
| Peroneal CMAP latency (ms)            | 4.34 ± 0.57    | 4.34 ± 0.20     | 0.799          |
| Peroneal CMAP amplitude (mV)          | 6.21 ± 2.25    | 48.57 ± 3.20    | 0.420          |
| Peroneal CV (m/s)                     | 48.29 ± 2.95   | 47.86 ± 3.01    | 0.757          |
| Peroneal F minimal latency (ms)       | 41.76 ± 3.95   | 48.57 ± 3.20    | 0.783          |
| Peroneal F persistency (%)            | 46.89 ± 17.70  | 47.92 ± 23.32   | 0.809          |
| Sural SAP amplitude (uV)              | 16.81 ± 4.19   | 18.51 ± 10.23   | 0.854          |
| Sural CV (m/s)                        | 51.14 ± 4.19   | 47.43 ± 5.77    | 0.089          |
| Radial Superficial SAP amplitude (uV) | 28.16 ± 7.59   | 32.26 ± 12.98   | 0.065          |
| Radial superficial CV (m/s)           | 66.23 ± 5.05   | 62.71 ± 5.36    | 0.220          |
| H reflex dx latency (ms)              | 30.38 ± 1.98   | 30.49 ± 2.56    | 0.799          |
| H reflex sx latency (ms)              | 30.09 ± 1.67   | 30.50 ± 2.61    | 0.689          |

Values are expressed by mean ± SD. RLS: restless legs syndrome; WED: Willis-Ekbom Disease; CMAP: compound muscle action potential; CV: conduction velocity.
